# Supplementary material
Source: HighWire-hosted journal article supplement (https://www.annfammed.org/highwire/filestream/607/field_highwire_adjunct_files/0/Smith_Supp_App.pdf)
Supplement: Smith_Supp_App.pdf [file Smith_Supp_App.pdf]

Supplemental materials for:

Smith PC, Lyon C, English A, Conry C. Practice transformation under the University of Colorado's Primary Care Redesign model. *Ann Fam Med.* 2019;17(Suppl\_1):S24-S32.

Supplemental Table 1: Provider Experience Survey

| Category                           | Question                                                                                                                                                                                                                                                                                                                                                                                                                                                                                                                                                                     | Jan 15                      | Jun 15      | Jan 16      | Nov 16      | May 17      | Nov 17      | Jul 18      |             |
|------------------------------------|------------------------------------------------------------------------------------------------------------------------------------------------------------------------------------------------------------------------------------------------------------------------------------------------------------------------------------------------------------------------------------------------------------------------------------------------------------------------------------------------------------------------------------------------------------------------------|-----------------------------|-------------|-------------|-------------|-------------|-------------|-------------|-------------|
|                                    | Response rate (%)                                                                                                                                                                                                                                                                                                                                                                                                                                                                                                                                                            | 66.7                        | 60.9        | 73.9        | 58.3        | 70.8        | 41.7        | 52.2        |             |
| Communication Coordination (Pilot) | People keep each other informed about work related issues in the team.                                                                                                                                                                                                                                                                                                                                                                                                                                                                                                       | 3.20                        | 3.21        | 3.47        | 3.67        | 3.88        | 3.73        | 4.17        |             |
|                                    | We keep in touch with each other as a team.                                                                                                                                                                                                                                                                                                                                                                                                                                                                                                                                  | 3.27                        | 3.07        | 3.29        | 3.77        | 3.82        | 3.75        | 4.17        |             |
|                                    | Team huddles or electronic huddles are used to discuss patient load for the day and/or plan for patient visits.                                                                                                                                                                                                                                                                                                                                                                                                                                                              | 3.07                        | 2.53        | 3.24        | 3.87        | 4.12        | 4.09        | 3.83        |             |
| Satisfaction (Pilot)               | <i>I am satisfied with my job.</i>                                                                                                                                                                                                                                                                                                                                                                                                                                                                                                                                           | 4.13                        | 3.73        | 4.06        | 3.83        | 4.53        | 4.23        | 4.33        |             |
| Efficiency (Pilot)                 | <i>I find my job easier to perform.</i>                                                                                                                                                                                                                                                                                                                                                                                                                                                                                                                                      |                             | 2.25        | 3.24        | 2.79        | 3.50        | 3.30        | 3.83        |             |
|                                    | <i>My appointments are more efficient.</i>                                                                                                                                                                                                                                                                                                                                                                                                                                                                                                                                   |                             | 2.40        | 3.24        | 3.00        | 4.00        | 3.60        | 3.24        |             |
|                                    | <i>I am satisfied with the efficiency of patient flow in my clinic.</i>                                                                                                                                                                                                                                                                                                                                                                                                                                                                                                      | 2.60                        | 2.73        | 3.31        | 2.89        | 3.94        | 3.54        | 4.25        |             |
| Documentation (Pilot)              | <i>I finish my clinical work before I leave the clinic each day.</i>                                                                                                                                                                                                                                                                                                                                                                                                                                                                                                         | 2.00                        | 2.73        | 2.93        | 2.72        | 3.06        | 3.08        | 2.75        |             |
|                                    | <i>My documentation time has decreased significantly.</i>                                                                                                                                                                                                                                                                                                                                                                                                                                                                                                                    |                             | 2.29        | 3.18        | 3.36        | 2.71        | 3.40        | 4.00        |             |
| Team Function Attitudes (Pilot)    | People feel understood and accepted by each other.                                                                                                                                                                                                                                                                                                                                                                                                                                                                                                                           | 3.13                        | 3.29        | 3.59        | 3.80        | 3.88        | 3.50        | 4.17        |             |
|                                    | The team approach makes the delivery of care more efficient.                                                                                                                                                                                                                                                                                                                                                                                                                                                                                                                 | 3.63                        | 3.20        | 3.00        | 3.88        | 4.18        | 4.31        | 4.67        |             |
|                                    | We have a "we are in it together" attitude.                                                                                                                                                                                                                                                                                                                                                                                                                                                                                                                                  | 3.13                        | 3.20        | 3.65        | 3.60        | 4.18        | 4.00        | 4.25        |             |
|                                    | We have a "patients first" attitude"                                                                                                                                                                                                                                                                                                                                                                                                                                                                                                                                         | 3.47                        | 3.36        | 3.82        | 3.80        | 4.24        | 4.00        | 4.67        |             |
|                                    | Working on a team keeps most health professionals enthusiastic and interested in their jobs.                                                                                                                                                                                                                                                                                                                                                                                                                                                                                 | 4.35                        | 3.73        | 4.06        | 4.06        | 4.35        | 4.31        | 4.33        |             |
|                                    | Team members have defined roles that makes optimal use of their training and skill sets.                                                                                                                                                                                                                                                                                                                                                                                                                                                                                     | 2.69                        | 3.00        | 3.53        | 3.53        | 4.00        | 4.18        | 4.17        |             |
| Scope of Practice (Pilot)          | <i>The in-basket messages I receive are appropriate for my role.</i>                                                                                                                                                                                                                                                                                                                                                                                                                                                                                                         | 2.44                        | 2.93        | 3.06        | 2.80        | 3.47        | 3.46        | 3.17        |             |
|                                    | <i>I do work that others on my team could be doing.***</i>                                                                                                                                                                                                                                                                                                                                                                                                                                                                                                                   | 1.69                        | 2.08        | 2.31        | 2.39        | 3.12        | 2.69        | 2.42        |             |
|                                    | Training is provided for team members taking on new roles and responsibilities.                                                                                                                                                                                                                                                                                                                                                                                                                                                                                              | 3.13                        | 3.33        | 3.94        | 4.13        | 4.00        | 4.18        | 4.08        |             |
|                                    | Protocols and standing orders have been implemented to better distribute workload throughout the team.                                                                                                                                                                                                                                                                                                                                                                                                                                                                       | 2.44                        | 3.21        | 3.94        | 4.07        | 4.35        | 4.27        | 4.17        |             |
| Burnout***                         | 5 - I enjoy my work. I have no symptoms of burnout<br>4 - Occasionally I am under stress, and I don't always have as much energy as I once did, but I don't feel burned out.<br>3 - I am definitely burning out and have one or more symptoms of burnout, such as physical and emotional exhaustion.<br>2 - The symptoms of burnout that I'm experiencing won't go away. I think about frustration at work a lot.<br>1 - I feel completely burned out and often wonder if I can go on. I am at the point where I may need some changes or may need to seek some sort of help | Pilot Practice Score (RR %) | 3.44 (66.7) | 3.50 (60.9) | 3.71 (73.9) | 3.21 (58.3) | 3.94 (70.8) | 3.60 (41.7) | 4.00 (52.2) |
|                                    | Wave 2 Practice Score (RR %)                                                                                                                                                                                                                                                                                                                                                                                                                                                                                                                                                 |                             |             |             |             | 3.8 (62.5)  | 4.5 (66.7)  | 4.5 (66.7)  | 4 (60.0)    |

All questions except Burnout are 5-point Likert scales: Not at all/Slightly/Somewhat/Mostly/Completely, or Strongly disagree/Disagree/Neither agree nor disagree/Agree/Strongly agree; *Italicized* items developed via modified Delphi process without formal psychometric testing.

\*\*\*Negatively worded items are reverse coded; higher values are desirable for all items.

Supplemental Table 2: Staff Experience Survey, Pilot Practice

| Category                           | Question                                                                                                                                                                                                                                                                                                                                                                                                                                                                                                                                                                     | Jan 15                     | Jun 15 | Jan 16 | Nov 16 | May 17      | Nov 17      | Jul 18      |             |
|------------------------------------|------------------------------------------------------------------------------------------------------------------------------------------------------------------------------------------------------------------------------------------------------------------------------------------------------------------------------------------------------------------------------------------------------------------------------------------------------------------------------------------------------------------------------------------------------------------------------|----------------------------|--------|--------|--------|-------------|-------------|-------------|-------------|
| Response Rate (%)                  |                                                                                                                                                                                                                                                                                                                                                                                                                                                                                                                                                                              | 94.1                       | 63.6   | 77.3   | 92.3   | 57.1        | 70.8        | 92.3        |             |
| Communication Coordination (Pilot) | People keep each other informed about work related issues in the team.                                                                                                                                                                                                                                                                                                                                                                                                                                                                                                       | 4.00                       | 4.11   | 3.30   | 3.76   | 4.06        | 3.20        | 3.76        |             |
|                                    | Team huddles or electronic huddles are used to discuss patient load for the day and/or plan for patient visits.                                                                                                                                                                                                                                                                                                                                                                                                                                                              | 4.43                       | 4.06   | 4.26   | 3.54   | 3.89        | 4.13        | 3.91        |             |
| Satisfaction (Pilot)               | <i>I am satisfied with my job.</i>                                                                                                                                                                                                                                                                                                                                                                                                                                                                                                                                           | 4.32                       | 4.17   | 4.26   | 4.27   | 4.00        | 4.00        | 4.32        |             |
| Efficiency (Pilot)                 | <i>I am satisfied with the efficiency of patient flow in my clinic.</i>                                                                                                                                                                                                                                                                                                                                                                                                                                                                                                      | 4.04                       | 3.39   | 3.43   | 3.67   | 4.06        | 3.73        | 4.12        |             |
| Team Function Attitudes (Pilot)    | People feel understood and accepted by each other.                                                                                                                                                                                                                                                                                                                                                                                                                                                                                                                           | 3.63                       | 3.89   | 2.91   | 3.40   | 3.37        | 2.73        | 3.56        |             |
|                                    | The team approach makes the delivery of care more efficient.                                                                                                                                                                                                                                                                                                                                                                                                                                                                                                                 | 4.40                       | 4.17   | 4.39   | 4.31   | 4.00        | 4.20        | 4.36        |             |
|                                    | We have a "we are in it together" attitude.                                                                                                                                                                                                                                                                                                                                                                                                                                                                                                                                  | 3.88                       | 3.89   | 3.17   | 3.56   | 3.78        | 3.20        | 3.88        |             |
|                                    | We have a "patients first" attitude"                                                                                                                                                                                                                                                                                                                                                                                                                                                                                                                                         | 4.00                       | 4.00   | 3.57   | 4.04   | 4.06        | 3.93        | 4.25        |             |
|                                    | Working on a team keeps most health professionals enthusiastic and interested in their jobs.                                                                                                                                                                                                                                                                                                                                                                                                                                                                                 | 4.16                       | 4.17   | 4.13   | 4.31   | 3.94        | 4.13        | 4.15        |             |
|                                    | Team members have defined roles that makes optimal use of their training and skill sets.                                                                                                                                                                                                                                                                                                                                                                                                                                                                                     | 3.71                       | 3.78   | 3.91   | 3.83   | 3.79        | 3.93        | 4.25        |             |
| Scope of Practice (Pilot)          | <i>The in-basket messages I receive are appropriate for my role.</i>                                                                                                                                                                                                                                                                                                                                                                                                                                                                                                         | 3.84                       | 3.78   | 3.57   | 3.50   | 3.75        | 3.36        | 3.16        |             |
|                                    | I do work that others on my team could be doing.***                                                                                                                                                                                                                                                                                                                                                                                                                                                                                                                          | 2.48                       | 2.78   | 3.09   | 2.69   | 2.84        | 2.53        | 2.68        |             |
|                                    | Training is provided for team members taking on new roles and responsibilities.                                                                                                                                                                                                                                                                                                                                                                                                                                                                                              | 4.26                       | 4.35   | 3.78   | 3.75   | 3.89        | 4.27        | 4.08        |             |
|                                    | Protocols and standing orders have been implemented to better distribute workload throughout the team.                                                                                                                                                                                                                                                                                                                                                                                                                                                                       | 3.86                       | 4.18   | 3.95   | 3.88   | 4.17        | 4.00        | 4.25        |             |
| Burnout***                         | 5 - I enjoy my work. I have no symptoms of burnout<br>4 - Occasionally I am under stress, and I don't always have as much energy as I once did, but I don't feel burned out.<br>3 - I am definitely burning out and have one or more symptoms of burnout, such as physical and emotional exhaustion.<br>2 - The symptoms of burnout that I'm experiencing won't go away. I think about frustration at work a lot.<br>1 - I feel completely burned out and often wonder if I can go on. I am at the point where I may need some changes or may need to seek some sort of help | Pilot Practice Score (RR%) |        |        |        | 3.75 (92.3) | 4.00 (57.1) | 2.80 (70.8) | 4.25 (92.3) |
|                                    |                                                                                                                                                                                                                                                                                                                                                                                                                                                                                                                                                                              | Wave 2 Score (RR%)         |        |        |        |             | 3.57 (91.0) | 3.79 (93.3) | 3.89 (75.0) |

All questions except Burnout are 5-point Likert scales: Not at all/Slightly/Somewhat/Mostly/Completely, or Strongly disagree/Disagree/Neither agree nor disagree/Agree/Strongly agree; *Italicized* items developed via modified Delphi process without formal psychometric testing. \*\*\*Negatively worded items are reverse coded; higher values are desirable for all items.

**Supplemental Figure 1: New patient appointments made within 2 days of request, Pilot vs. Wave 2 Practice Shaded areas represent 3 standard deviations  $\pm$  pre-implementation mean**

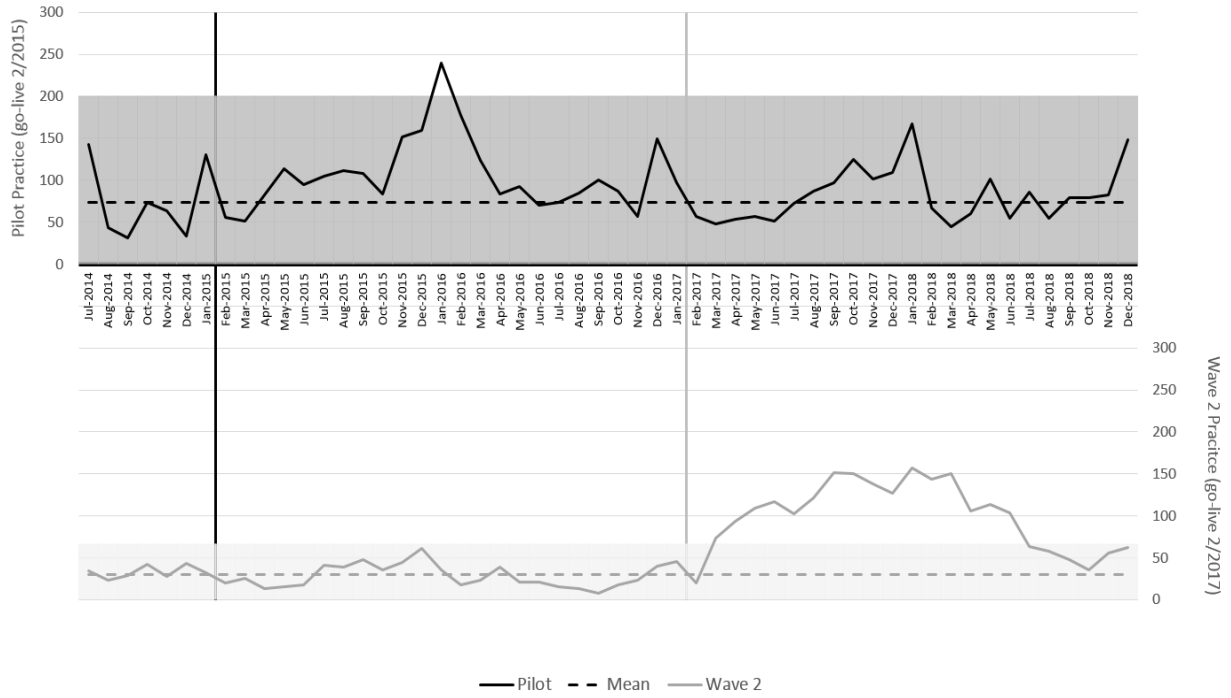

Supplemental Figure 2: Colorectal Cancer Screening, Pilot vs. Wave 2  
 Practice Shaded areas represent 3 standard deviations  $\pm$  pre-

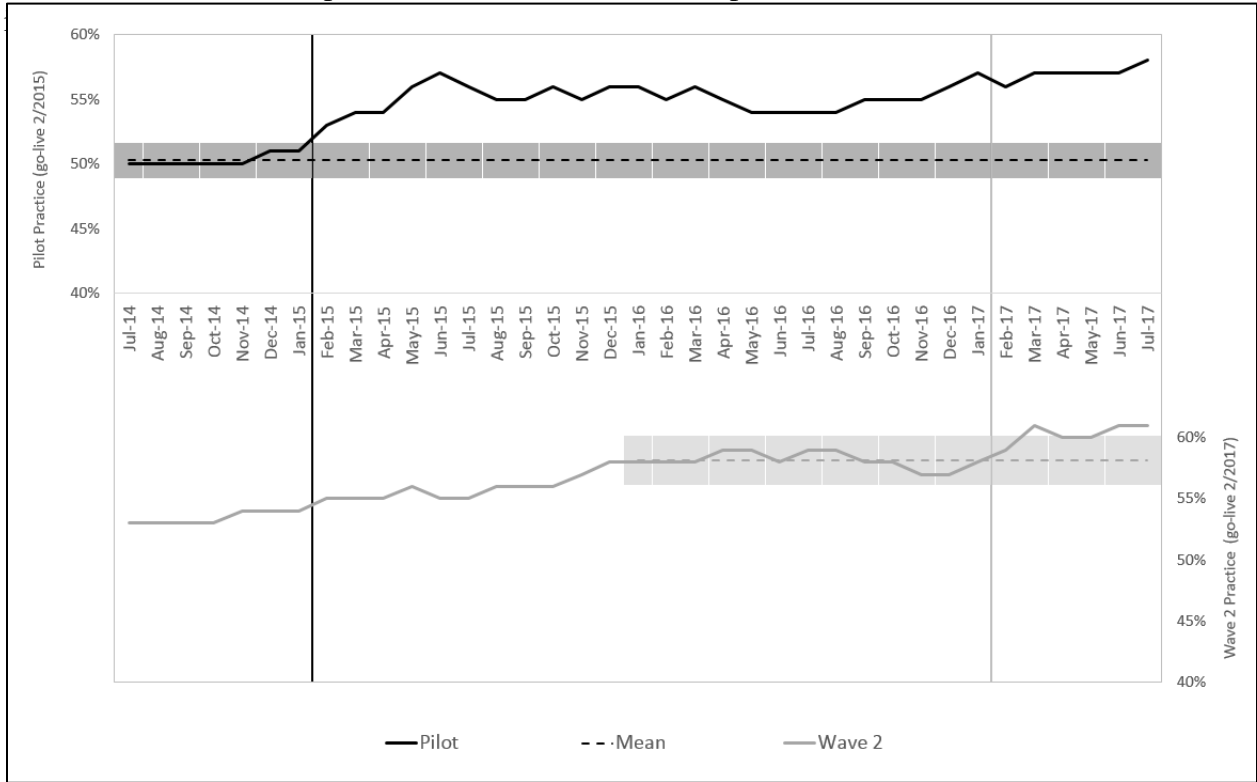

Supplemental Figure 3: Diabetes Process Measures and Uncontrolled Hgb A1C, Pilot vs. Wave 2 Practice

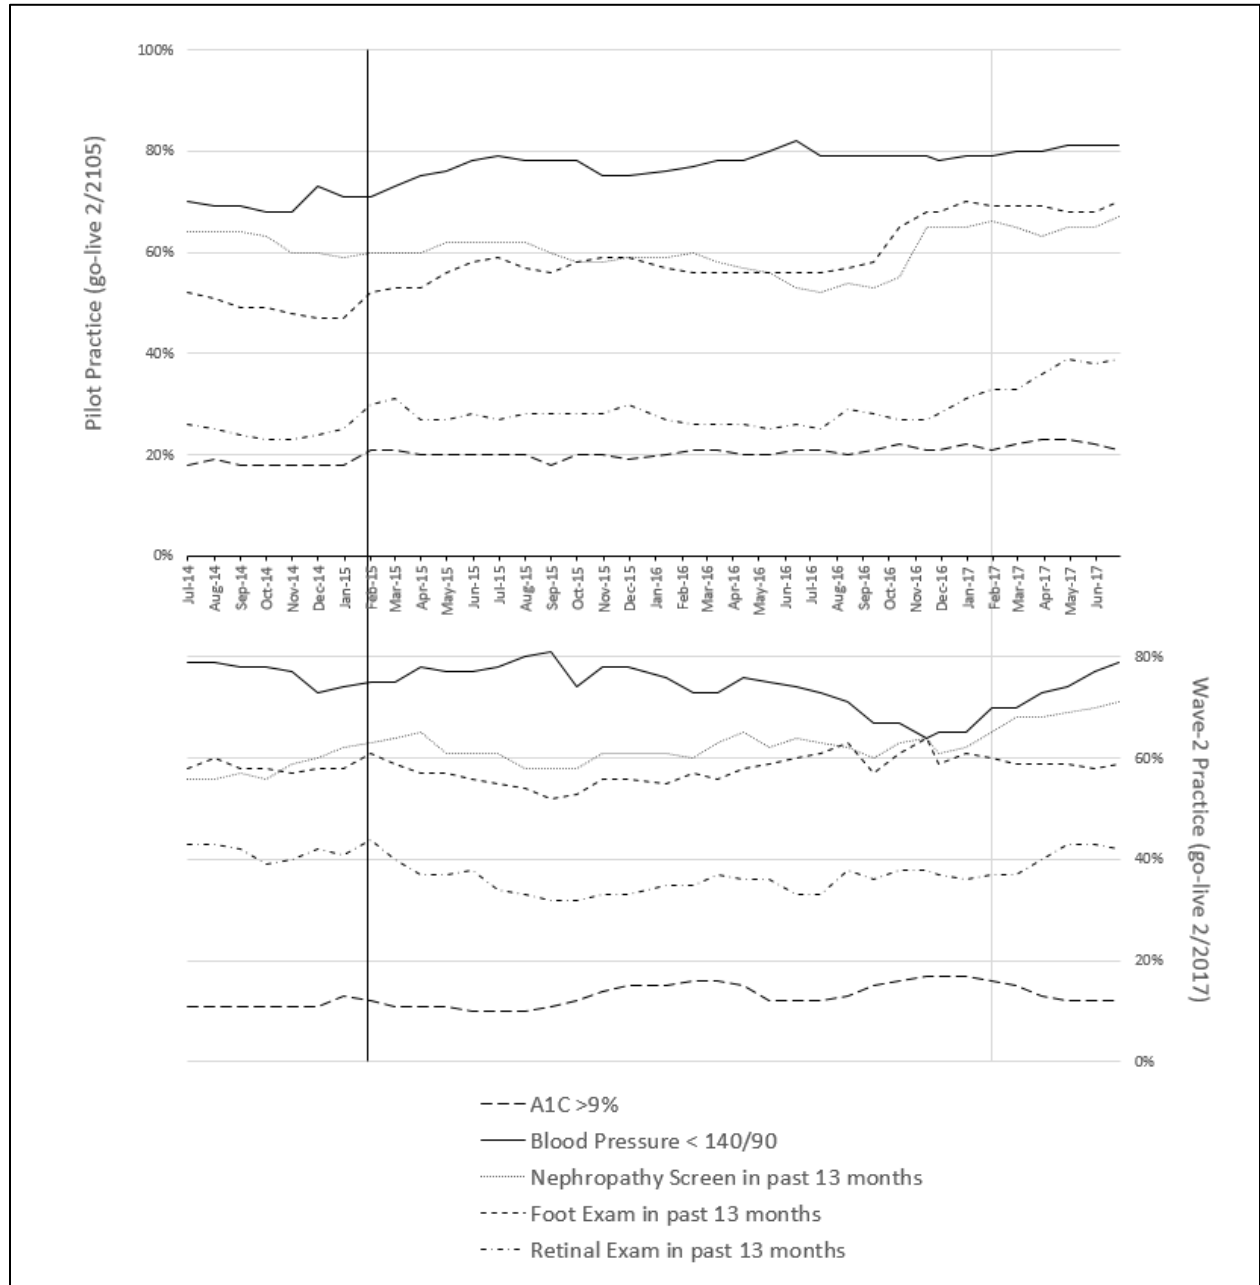

Supplemental Figure 4: Patients with diabetes on the problem list seen in the last 13 months

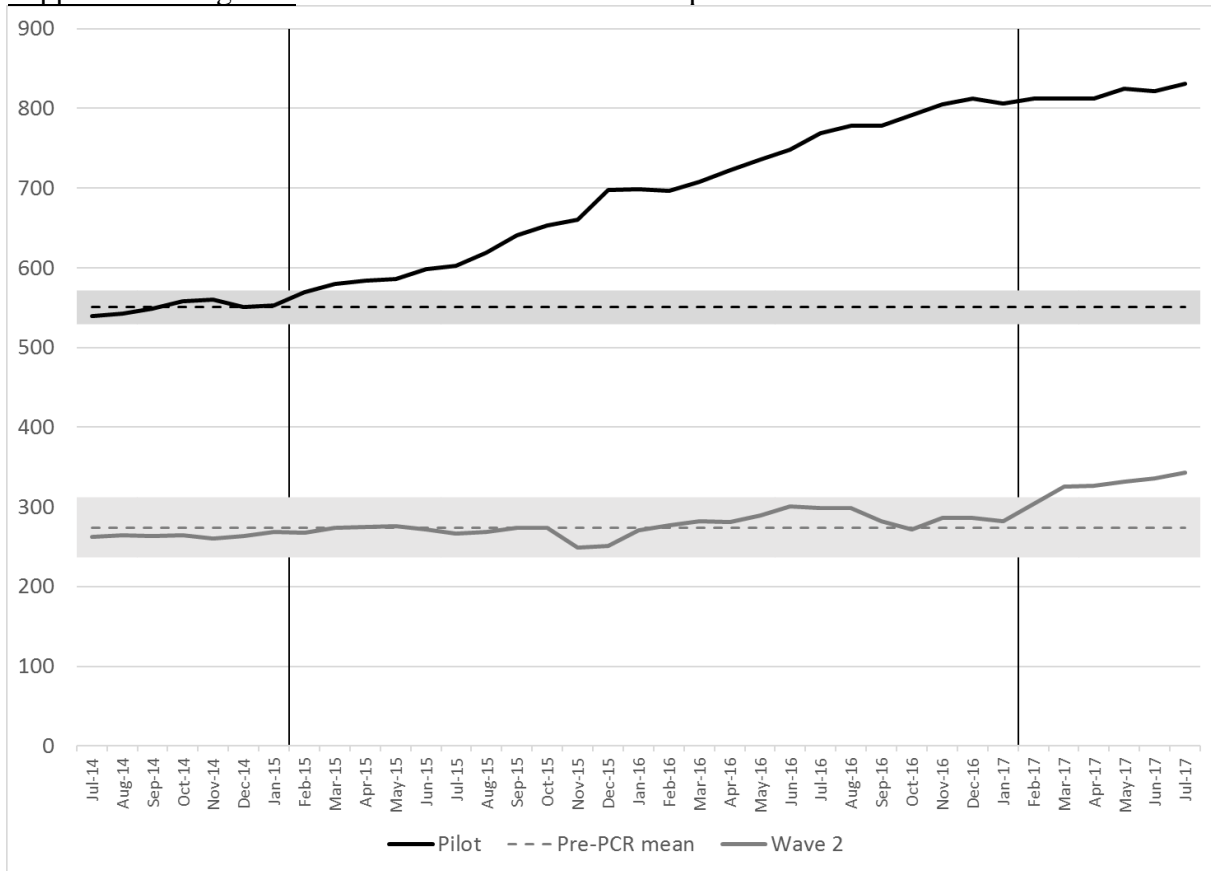

Vertical lines mark formal start of PCR for each practice. Dashed lines represent the pre-2/15 mean. Shaded areas represent  $\pm 3\sigma$  upper and lower control limits.

Supplemental Figure 5: Staffing Hours Per Visit, Pilot vs. Wave 2

Practice

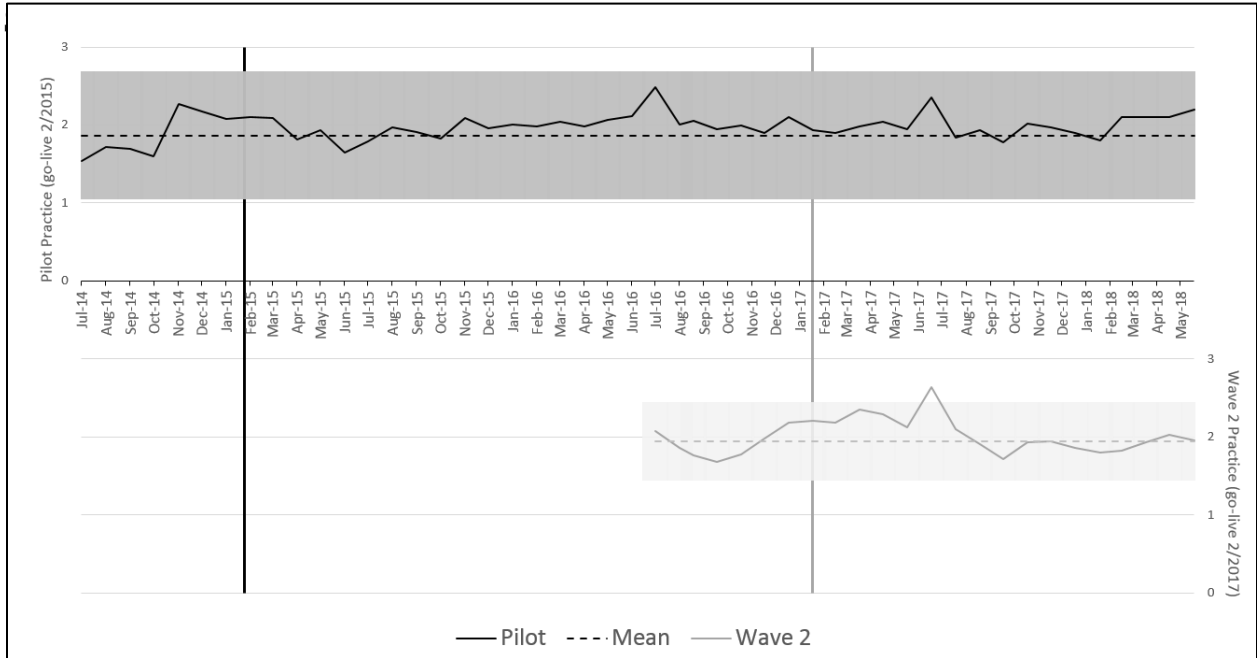

Vertical lines mark formal start of PCR for each practice. Dashed lines represent the pre-2/15 mean. Shaded areas represent  $\pm 3\sigma$  upper and lower control limits.
